# Supplementary material for: IMPDH inhibition activates TLR‐VCAM1 pathway and suppresses the development of MLL‐fusion leukemia
Source: PubMed Central journal article supplement (PMC9832838; doi:10.15252/emmm.202115631), 2022-12-01
Supplement: EMMM-15-e15631-s001.pdf [file EMMM-15-e15631-s001.pdf]

# **IMPDH inhibition activates TLR-VCAM1 pathway and suppresses the development of MLL-fusion leukemia**

Xiaoxiao Liu, et al.

\* Correspondence: [goyama@edu.k.u-tokyo.ac.jp](mailto:goyama@edu.k.u-tokyo.ac.jp)

This PDF file includes 4 Appendix tables and 10 Appendix Figures together with legends:

- Appendix Table S1: Information of PDX samples
- Appendix Table S2: Antibodies used for Western Blotting
- Appendix Table S3: Antibodies used for Flow Cytometry
- Appendix Table S4: Antibodies used for Single Cell Mass Cytometry
- Appendix Figures S1: Guanosine supplementation reversed the effect of IMPDH inhibitors on human myeloid leukemia cells in vitro
- Appendix Figures S2: MPA induced cell cycle arrest, apoptosis of MOLM13 cells
- Appendix Figures S3: Combination effects of MPA with Decitabine or with Venetoclax on MLL-AF9 cells
- Appendix Figures S4: The effect of IMPDH inhibitors on human lymphoid leukemia cells in vitro
- Appendix Figures S5: IMPDH inhibitors show less efficiency in PDX-derived leukemia in immunodeficiency mice
- Appendix Figures S6: No substantial effects of the alternate-day administration of FF-10501-01 on the numbers of immune cells in mice
- Appendix Figures S7: Reduced purine and pyrimidine levels in FF-10501-01 treated MLL-AF9 cells
- Appendix Figures S8: Altered levels of bases and amino acids in FF-10501-01 treated MLL-AF9 cells
- Appendix Figures S9: Single-cell Mass Cytometry's gating strategy and results
- Appendix Figures S10: Vcam1 is dispensable for FF-10501-01-induced myeloid differentiation of MLL-AF9 cells

**Appendix Table S1. Information of PDX samples**

| <b>Sample No.</b> | <b>PDX ID</b> | <b>Disease Stage</b> | <b>Genetic abnormalities</b> | <b>Lineage</b> |
|-------------------|---------------|----------------------|------------------------------|----------------|
| AML#1             | 2017-14       | R/R                  | tAML, MLL/AF10               | AML            |
| AML#2             | 2016-7        | R/R                  | MLL/AF9                      | AML            |
| AML#3             | 2013-11       | R/R                  | MLL/SEPT6                    | AML            |
| AML#4             | 2017-94       | R/R                  | Complex Karyotype            | AML            |
| AML#5             | 2017-63       | R/R                  | Mnx1/ETV6 PTPN11             | AML            |
| AML#6             | 2016-97       | R/R                  | CBFA2T3-GLIS2                | AML            |
| AML#7             | 2017-38       | R/R                  | MLL/AF9 with Nras mutation   | AML            |
| ALL#1             | 2019-116      |                      | t (4;11) -- MLL/AF4          | ALL            |
| ALL#2             | 2018-190      | De novo              | Infant MLL/MA9               | ALL            |

**Appendix Table S2. Antibodies used for Western Blotting**

| <b>Protein detected</b>             | <b>Catalog number</b> | <b>Supplier</b>           | <b>Dilution ratio</b> |
|-------------------------------------|-----------------------|---------------------------|-----------------------|
| p53 (DO-1)                          | sc-126                | Santa Cruz                | 1/1000                |
| p53 (1C12)                          | 2524                  | Cell Signaling Technology | 1/1000                |
| Bax                                 | 2774                  | Cell Signaling Technology | 1/1000                |
| BCL2 (D55G8)                        | 4223                  | Cell Signaling Technology | 1/1000                |
| p21 Waf1/Cip1 (12D1)                | 2947                  | Cell Signaling Technology | 1/1000                |
| IMPDH2 (E2Q1Z)                      | 57068                 | Cell Signaling Technology | 1/1000                |
| IMPDH1 (E5Z5F)                      | 35914                 | Cell Signaling Technology | 1/1000                |
| phospho-IKb (Ser32/36)              | 9246                  | Cell Signaling Technology | 1/1000                |
| Ikb (L35A5)                         | 4814                  | Cell Signaling Technology | 1/1000                |
| phospho-p38 (Thr180/Tyr182) (28B10) | 9216                  | Cell Signaling Technology | 1/1000                |
| p38 MAPK                            | 9212                  | Cell Signaling Technology | 1/1000                |
| GAPDH (D16H11) XP                   | 5174                  | Cell Signaling Technology | 1/2000                |
| Tubulin (D-66)                      | T0198                 | Sigma-Aldrich             | 1/2000                |

**Appendix Table S3. Antibodies used for Flow Cytometry**

| <b>Antibody Name</b>      | <b>Fluorescence</b> | <b>Clone</b> | <b>Catalog Number</b> | <b>Supplier</b> | <b>Dilution ratio</b> |
|---------------------------|---------------------|--------------|-----------------------|-----------------|-----------------------|
| anti-mouse-Gr-1 (Ly6G/6C) | PE                  | RB-8C6       | 108408                | Biolegend       | 1/400                 |
| anti-mouse-CD117 (c-Kit)  | APC                 | 2B8          | 17-1171-83            | eBioscience     | 1/400                 |
| anti-mouse/human-CD11b    | PE-Cy7              | M1/70        | 101216                | Biolegend       | 1/400                 |
| Annexin V                 | APC                 |              | 640920                | Biolegend       | 1/100                 |
| Vybrant DyeCycle          | violet              |              | V35003                | Invitrogen      | 1/250                 |
| anti-human-CD11b          | PE                  | ICRF44       | 301306                | Biolegend       | 1/400                 |
| anti-human-CD14           | APC                 | M5E2         | 301808                | Biolegend       | 1/400                 |
| anti-human-CD66b          | PE-Cy7              | G10F5        | 305115                | Biolegend       | 1/400                 |
| anti-human-CD115          | APC                 | 9-4D2-1E4    | 347306                | Biolegend       | 1/400                 |
| anti-human-CD45           | FITC                | HI30(RUO)    | 555482                | BD Bioscience   | 1/200                 |
| anti-human-CD19           | PE-Cy7              | HIB19        | 302215                | Biolegend       | 1/400                 |
| anti-human-CD10           | PE                  | HI10a        | 312204                | Biolegend       | 1/400                 |
| anti-human-CD34           | APC                 | 561          | 343608                | Biolegend       | 1/200                 |
| anti-mouse-NK1.1          | PE                  | PK136        | 12-5941-83            | eBioscience     | 1/400                 |
| anti-mouse-CD3            | eFluor 450          | 17A2         | 48-0032-82            | eBioscience     | 1/400                 |
| anti-mouse-CD8a           | PE                  | 53-6.7       | 100707                | Biolegend       | 1/500                 |
| anti-mouse-CD4            | BV421               | GK1.5        | 100438                | Biolegend       | 1/400                 |
| anti-mouse-CD19           | PE-Cy7              | 6D5          | 115520                | Biolegend       | 1/400                 |

|                           |                 |               |            |                |       |
|---------------------------|-----------------|---------------|------------|----------------|-------|
| anti-mouse/human-B220     | APC             | RA3-6B2       | 10-0452-81 | eBioscience    | 1/400 |
| anti-mouse-CD115          | PE              | AFS98         | 135505     | Biolegend      | 1/400 |
| anti-mouse-Gr1            | biotin          | RB6-8C5       | 108404     | Biolegend      | 1/400 |
| streptavidin              | BV421           |               | 405226     | Biolegend      | 1/200 |
| anti-mouse-F4/80          | APC             | BM8           | 123115     | Biolegend      | 1/400 |
| anti-mouse-CD106 (VCAM-1) | Alexa Fluor 647 | 429 (MVCAM.A) | 105712     | Biolegend      | 1/400 |
| anti-mouse-CD98 (4F2)     | PE              | RL388         | 128207     | Biolegend      | 1/400 |
| anti-human-CD98           | PE              | UM7F8         | 556077     | BD Biosciences | 1/400 |

**Appendix Table S4. Antibodies used for Single Cell Mass Cytometry**

| <b>Metal Tag</b> | <b>Antigen</b>                     | <b>Clone</b> | <b>Vendor</b> | <b>Cat No.</b> | <b>Dilution ratio</b> |
|------------------|------------------------------------|--------------|---------------|----------------|-----------------------|
| 141Pr            | Ly-6G/C(Gr1)                       | RB6-8C5      | Fluidigm      | 3141005B       | 1/100                 |
| 143Nd            | CD41                               | MWreg30      | Fluidigm      | 3143009B       | 1/100                 |
| 145Nd            | CD4                                | RM4-5        | Fluidigm      | 3145002B       | 1/100                 |
| 146Nd            | *VCAM1                             | MVCAM.A(429) | Bio Legend    | 105702         | 1/100                 |
| 147Sm            | CD45.2                             | 104          | Fluidigm      | 3147004B       | 1/100                 |
| 149Sm            | *CXCR4(CD184)                      | L276F12      | Bio legend    | 146502         | 1/100                 |
| 150Nd            | *HIF1 $\alpha$                     | H206         | Santa Claus   | sc-10790       | 1/100                 |
| 151Eu            | CD49d (Integrin alpha 4)           | R1-2         | Fluidigm      | 3151016B       | 1/100                 |
| 152Sm            | phospho-Akt [S473]                 | D9E          | Fluidigm      | 3152005A       | 1/100                 |
| 153Eu            | phospho-STAT1 [Y701]               | 58D6         | Fluidigm      | 3153003A       | 1/100                 |
| 156Gd            | phospho-p38 MAP Kinase [T180/Y182] | D3F9         | Fluidigm      | 3156002A       | 1/100                 |
| 158Gd            | phospho-STAT3 [Y705]               | 4/P-STAT3    | Fluidigm      | 3158005A       | 1/100                 |
| 159Tb            | phospho-MAPKAP Kinase2 [T334]      | 27B7         | Fluidigm      | 3159010A       | 1/100                 |
| 160Gd            | CD45R (B220)                       | RA3-6B2      | Fluidigm      | 3160012B       | 1/100                 |
| 161Dy            | Ki-67                              | B56          | Fluidigm      | 3161007B       | 1/100                 |
| 162Dy            | *p53 (For whole protein)           | X77          | Abcam         | ab16465        | 1/100                 |
| 163Dy            | *phospho-mTOR [S2448]              | EPR426(2)    | Abcam         | ab109268       | 1/100                 |

|       |                                |            |             |            |       |
|-------|--------------------------------|------------|-------------|------------|-------|
| 165Ho | beta-Catenin                   | D13A1      | Fluidigm    | 3165027A   | 1/100 |
| 167Er | *EPCR (CD201)                  | eBio 1560  | eBioscience | 16-2012-83 | 1/100 |
| 168Er | CD8a                           | 53-6.7     | Fluidigm    | 3168003B   | 1/100 |
| 169Tm | Ly-6A/E (Sca-1)                | D7         | Fluidigm    | 3169015B   | 1/100 |
| 170Er | CD49b                          | HMa2       | Fluidigm    | 3170008B   | 1/100 |
| 171Yb | phospho-ERK 1/2 [T202/Y204]    | D13.14.4E  | Fluidigm    | 3171010A   | 1/100 |
| 172Yb | CD11b (Mac-1)                  | M1/70      | Fluidigm    | 3172012B   | 1/100 |
| 173Yb | CD117 (c-kit)                  | 2B8        | Fluidigm    | 3173004B   | 1/100 |
| 174Yb | phospho-STAT4                  | 38/p-Stat4 | Fluidigm    | 3174005A   | 1/100 |
| 175Lu | *PGC1 alpha                    | polyclonal | Abcam       | ab54481    | 1/100 |
| 191Ir | Cell-ID™ Intercalator-Ir (DNA) | NA         | Fluidigm    | 201192A    | 1/100 |
| 193Ir | Cell-ID™ Intercalator-Ir (DNA) | NA         | Fluidigm    | 201192A    | 1/100 |
| 198Pt | Cell-ID™ Cisplatin (Live/Dead) | NA         | Fluidigm    | 201198     | 1/100 |

NA: not available

## Appendix Figure legends

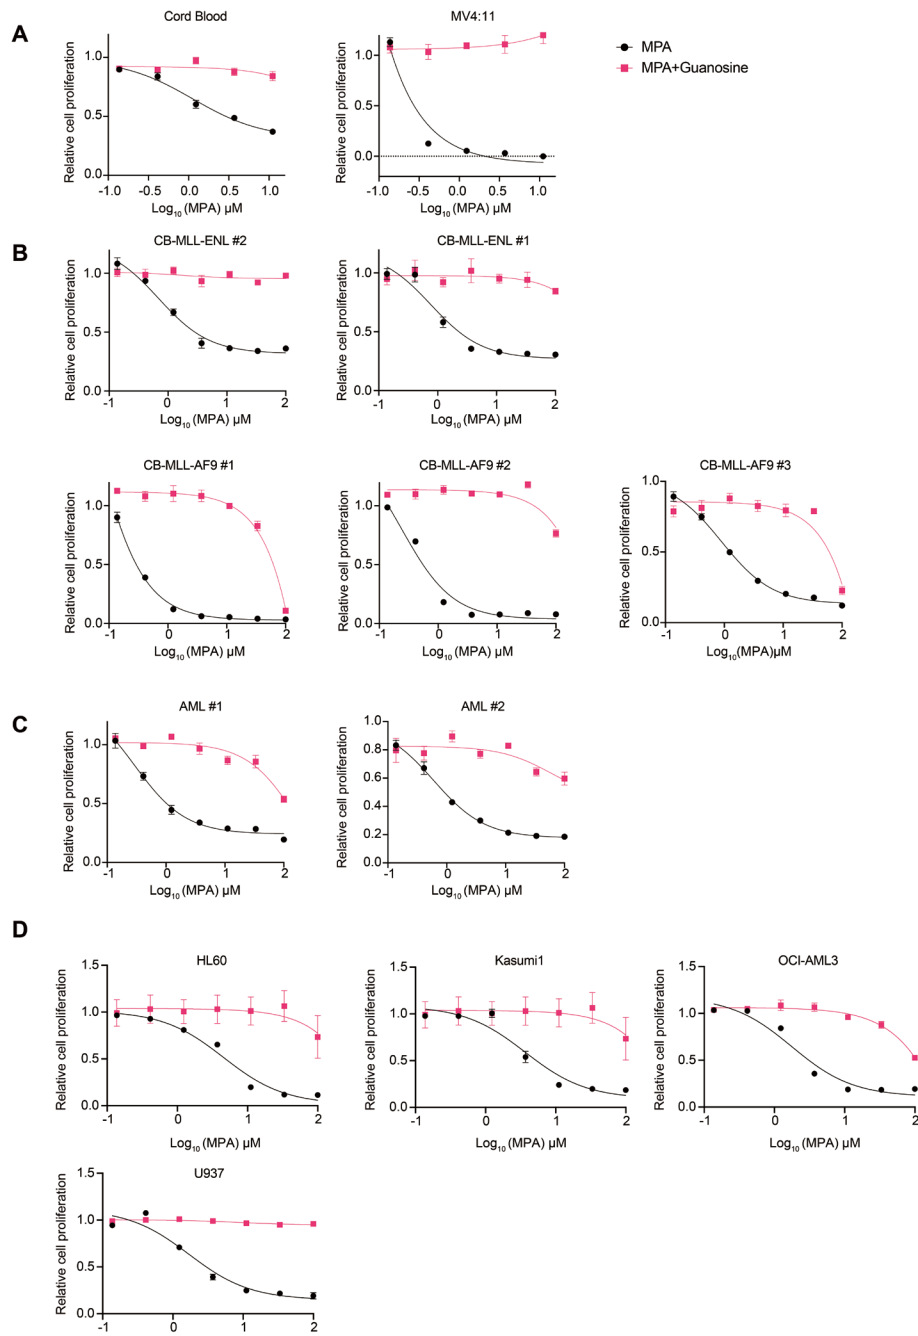

### Appendix Figure S1. Guanosine supplementation reversed the effect of IMPDH inhibitors on human myeloid leukemia cells *in vitro*

Cell viability assays were performed using WST-8 or WST-1. Human CB CD34<sup>+</sup> cells and MV4; 11 cells (A), CB cells expressing MLL-ENL (CB-MLL-ENL-#1, 2) or MLL-AF9 (CB-MLL-AF9#1, 2, 3) (B) and patient cells (AML#1 and AML#2), (C) Human myeloid leukemia cell lines (HL60, Kasumi-1, OCI-AML3, U937) (D) were treated with titrating doses of MPA (1-100 mM) for 72 hours with/without 100  $\mu\text{M}$  Guanosine in triplicates.



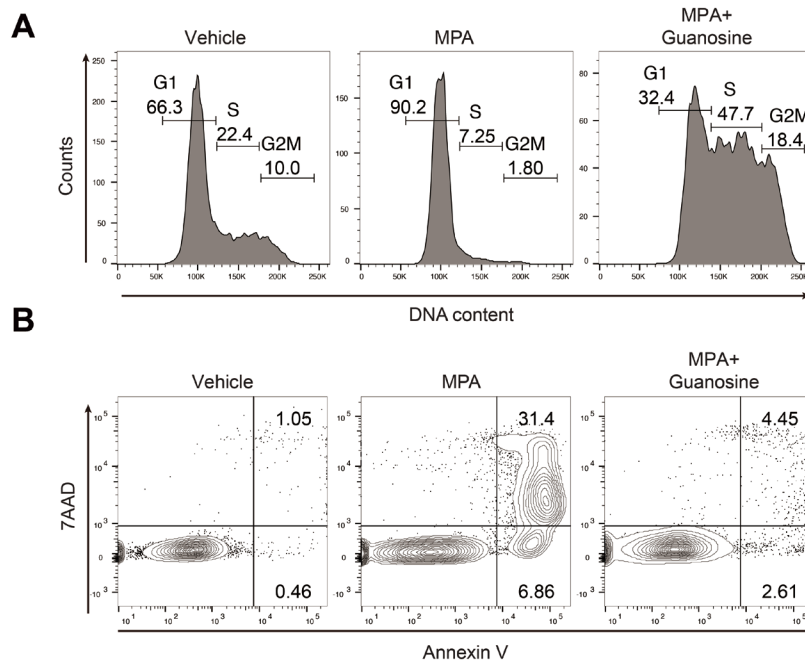

**Appendix Figure S2. MPA induced cell cycle arrest, apoptosis of MOLM13 cells**

FCM plots showing the cell cycle status (A), apoptosis (B) in MOLM13 cells treated with/without 1 mM MPA and 100 mM Guanosine for 36 hours. The number shows in (A) indicate the frequency of G1, S, G2M phase of the cells and the number shows in (B) indicate the frequency of apoptotic cells.

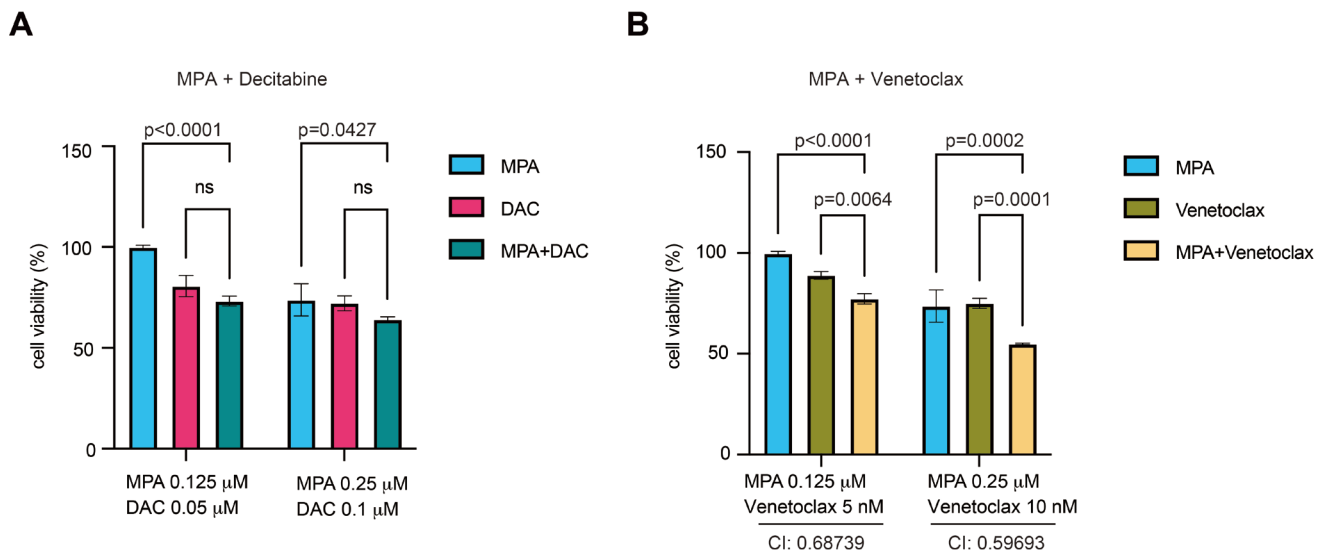

**Appendix Figure S3. Combination effects of MPA with Decitabine or with Venetoclax on MLL-AF9 cells**

Cell viability assays were performed using WST-8. MLL-AF9-expressing CB cells were treated with the indicated doses of MPA (0.125 or 0.25 mM) together with (A) decitabine (0.05 or 0.1 mM) or with (B) Venetoclax (5 or 10 nM) for 72 hours in triplicates. Combination index (CI) was calculated using COMPUSYN (<https://www.combosyn.com/>).

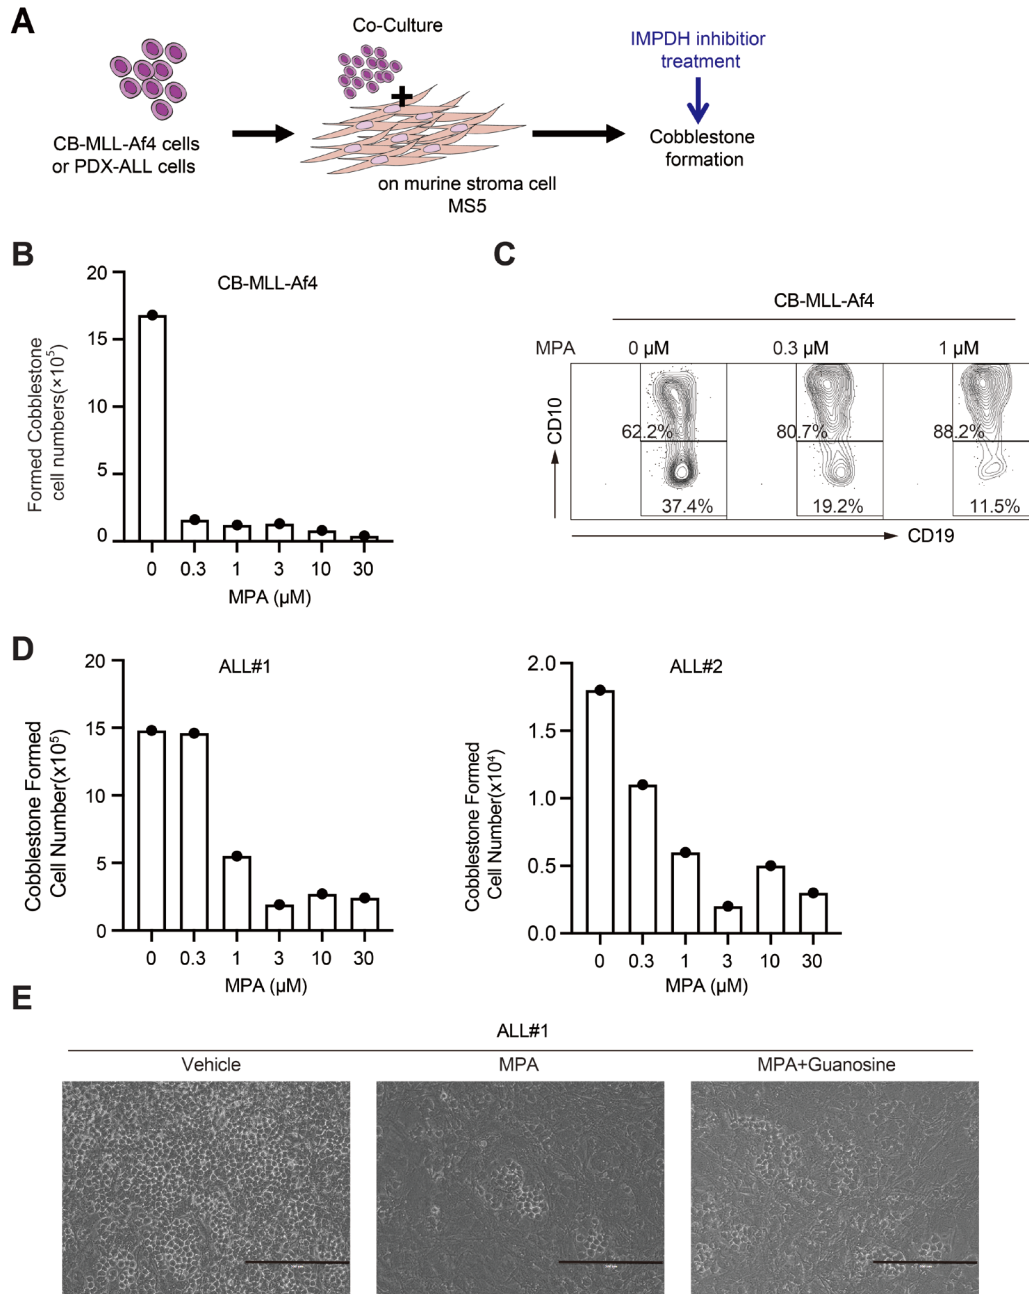

**Appendix Figure S4. The effect of IMPDH inhibitors on human lymphoid leukemia cells *in vitro***

(A) Experimental Scheme used in (B)-(E). MLL-Af4-expressing CB (CB-MLL-Af4) cells or patient-derived ALL cells were co-cultured with murine stromal cell line MS-5. MPA was added at the indicated concentration to the coculture. The numbers of cobblestone forming cells were counted after 6 days culture. (B) Counts of cobblestone forming CB-MLL-Af4 cells are shown. (C) FCM plots of CD10 and CD19 expression in cobblestone formed MLL-Af4 cells with MPA at indicated concentrations after one-week culture. (D) Counts of cobblestone forming patient derived ALL cells ALL#1 (left) or ALL#2 (right) were shown. (E) Representative pictures of cobblestone forming cells treated with vehicle, 1 μM MPA with/without 100 μM guanosine are shown. Scale bar is 200 μm

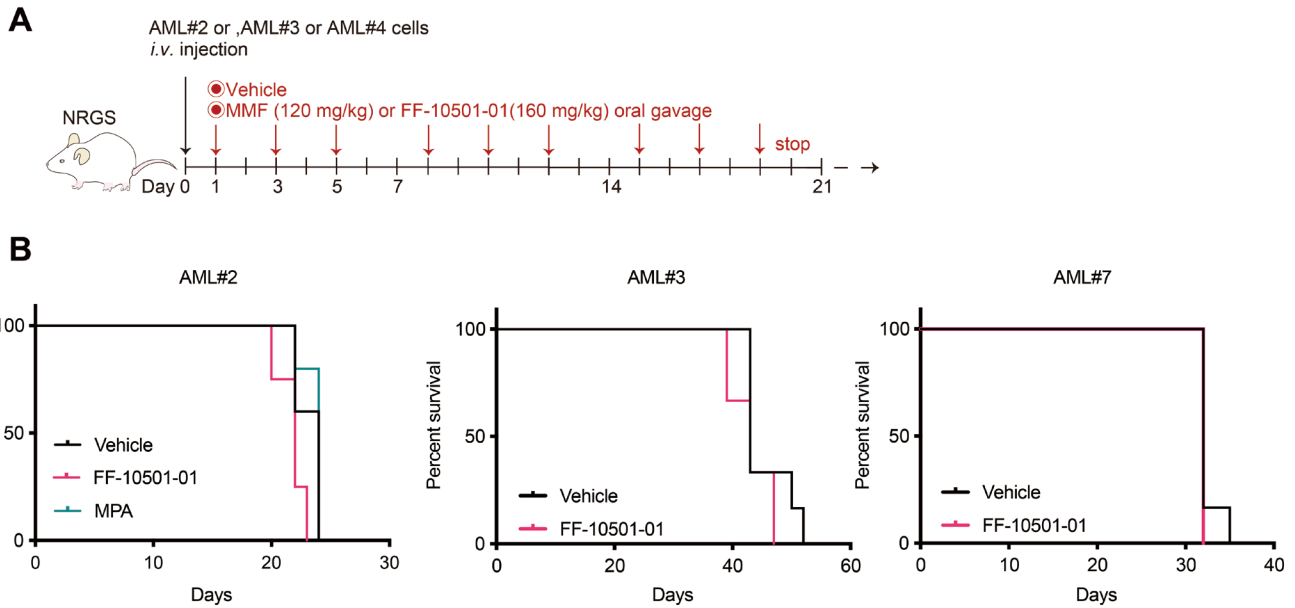

**Appendix Figure S5. IMPDH inhibitors show less efficiency in PDX-derived leukemia in immunodeficiency mice.**

(A) Experimental scheme used in (B). MLL-fusion PDX-derived cells (AML#2, AML#3, AML#7, and see Appendix Table S1) were transplanted to NRGS mice and treated with vehicle, MMF or FF-10501-01 every other day for three weeks. (B) Kaplan-Meier survival curves were shown. For AML#2, vehicle: n=5, FF: n=4, MMF: n=5. For AML#3 and AML#7, n=6 per group.

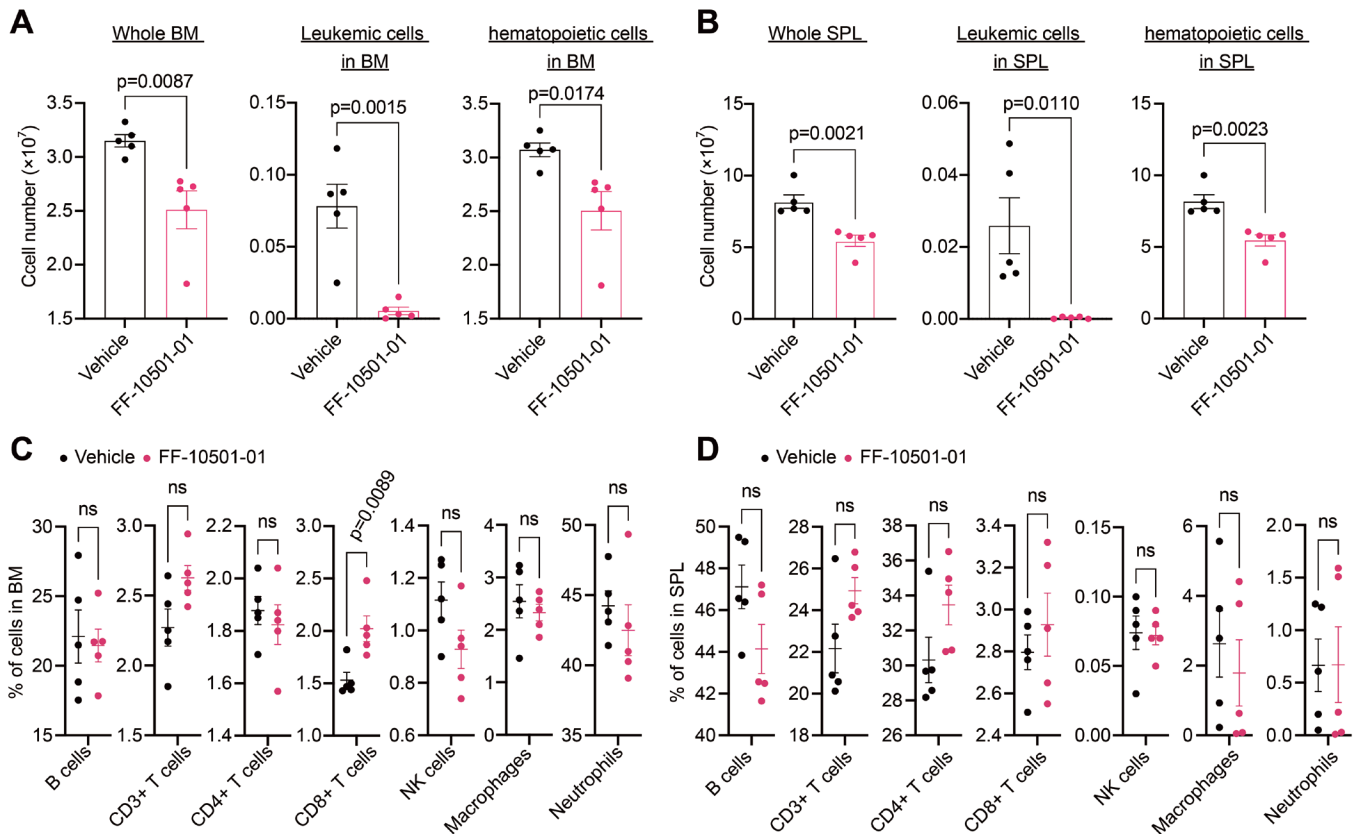

**Appendix Figure S6. No substantial effects of the alternate-day administration of FF-10501-01 on the numbers of immune cells in mice**

(A and B) C57BL/6J mice were transplanted with MLL-AF9-GFP cells and were then treated with vehicle (n=5) or FF-10501-01 (n=5) every other day. Bone marrow and spleen cells were collected and analyzed on day 10. The numbers of whole bone marrow cells, GFP<sup>+</sup> leukemic cells, and GFP<sup>-</sup> recipient-derived hematopoietic cells in bone marrow (A) and spleen (B), and the frequencies of immune cells (B220<sup>+</sup>CD19<sup>+</sup> B cells, CD3<sup>+</sup>, CD4<sup>+</sup>, CD8<sup>+</sup> T cells, CD3<sup>+</sup>NK1.1<sup>+</sup> NK cells, CD11b<sup>+</sup>/CD11b<sup>low</sup>Gr1<sup>+</sup>F4/80<sup>+</sup> macrophages, Gr1<sup>high</sup>CD11b<sup>+</sup> neutrophils) in bone marrow (C) and spleen (D) are shown. A two-tailed unpaired t-test was used for the comparison.

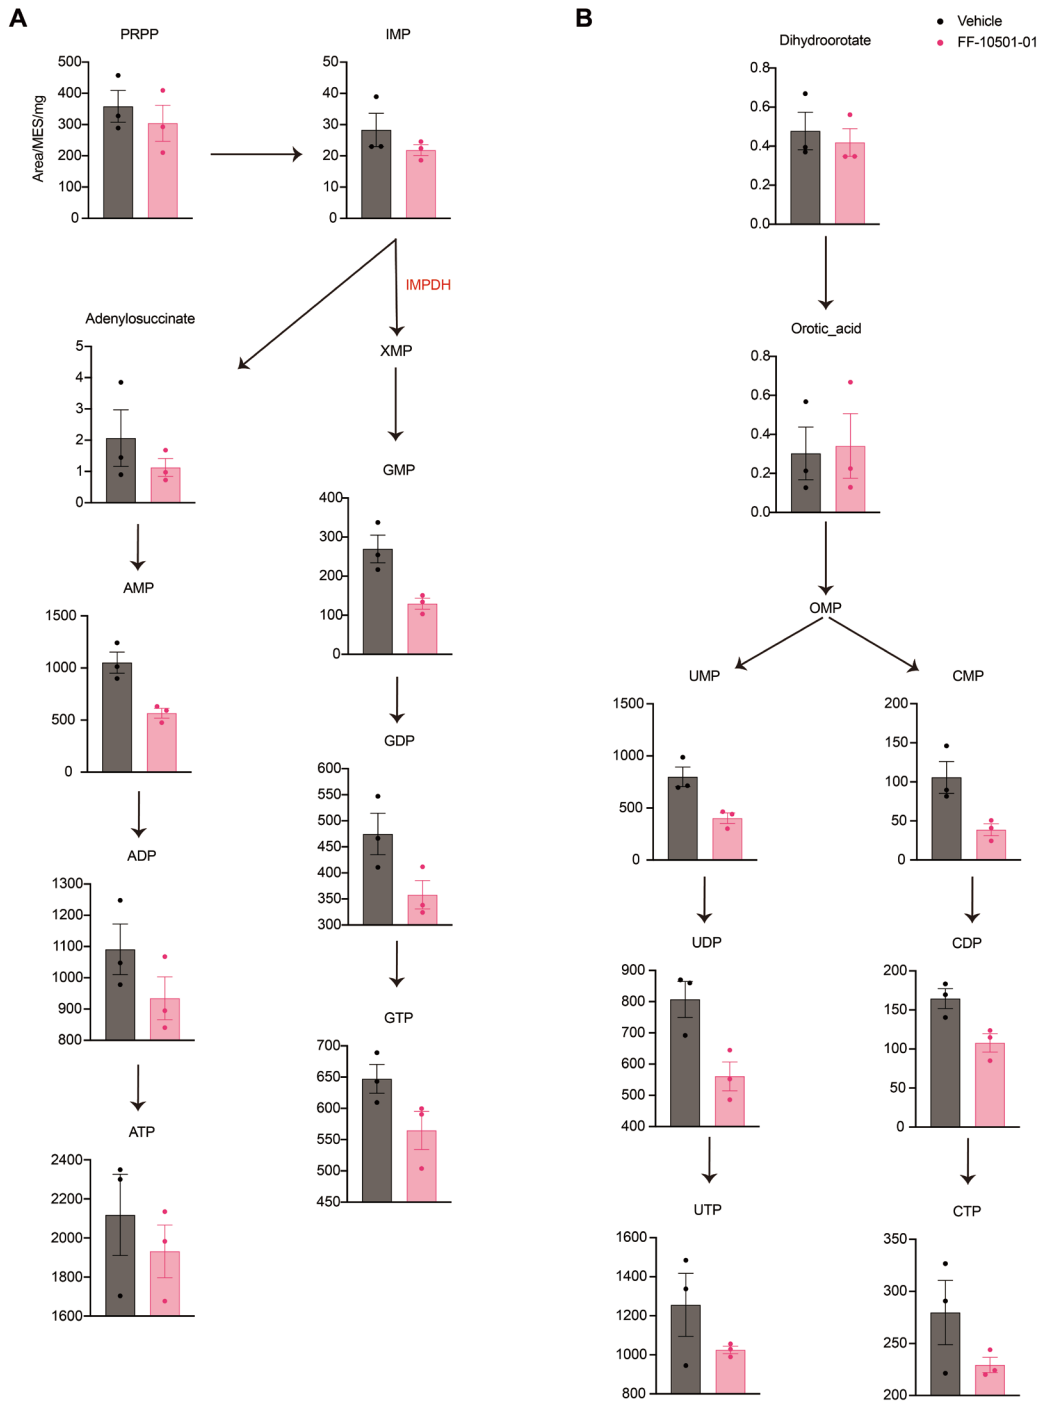

**Appendix Figure S7. Reduced purine and pyrimidine levels in FF-10501-01 treated MLL-AF9 cells**

C57BL/6J mice were transplanted with MLL-AF9-GFP cells and were treated with vehicle or FF-10501-01 on day 11 and day 12. GFP<sup>+</sup> MLL-AF9 cells were collected from vehicle- or FF-10501-01-treated mice and were used for metabolome analysis on day 13. Levels of the molecules in purine (A) and pyrimidine (B) synthesis pathway were assessed using LC-MS analysis. Black: Vehicle-, Pink: FF-10501-01-treated MLL-AF9 cells.

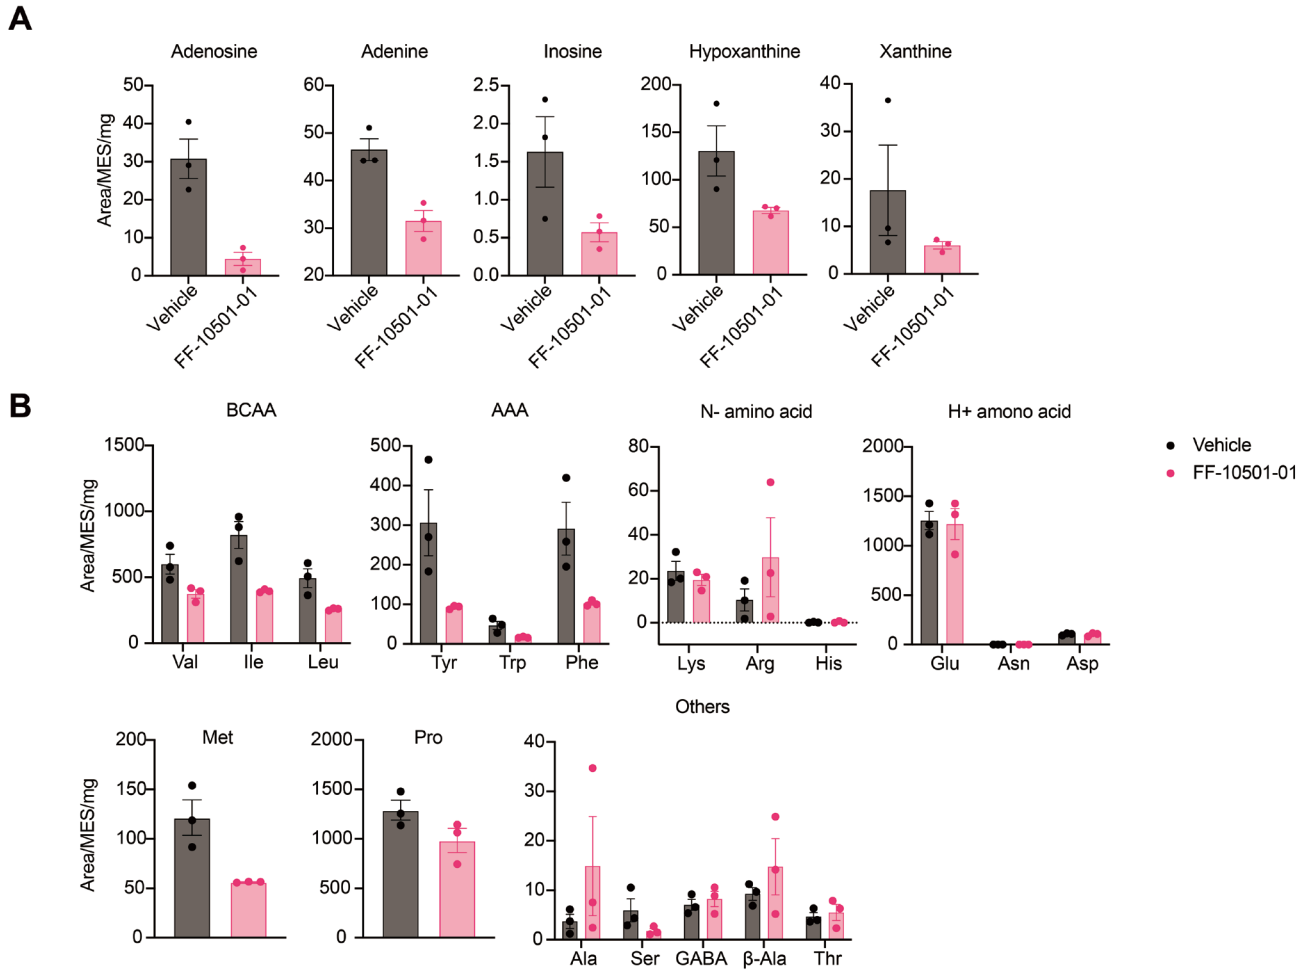

**Appendix Figure S8. Altered levels of bases and amino acids in FF-10501-01 treated MLL-AF9 cells.**

(A) Levels of adenosine, adenine, inosine, hypoxanthine, xanthine in Vehicle (Black) or FF-10501-01 (Pink) treated MLL-AF9 cells. The y-axis is calculated by area/MES/mg. (B) Amino acid levels in Vehicle (Black) or FF-10501-01 (Pink) treated MLL-AF9 cells. The y-axis is calculated by area/MES/mg.

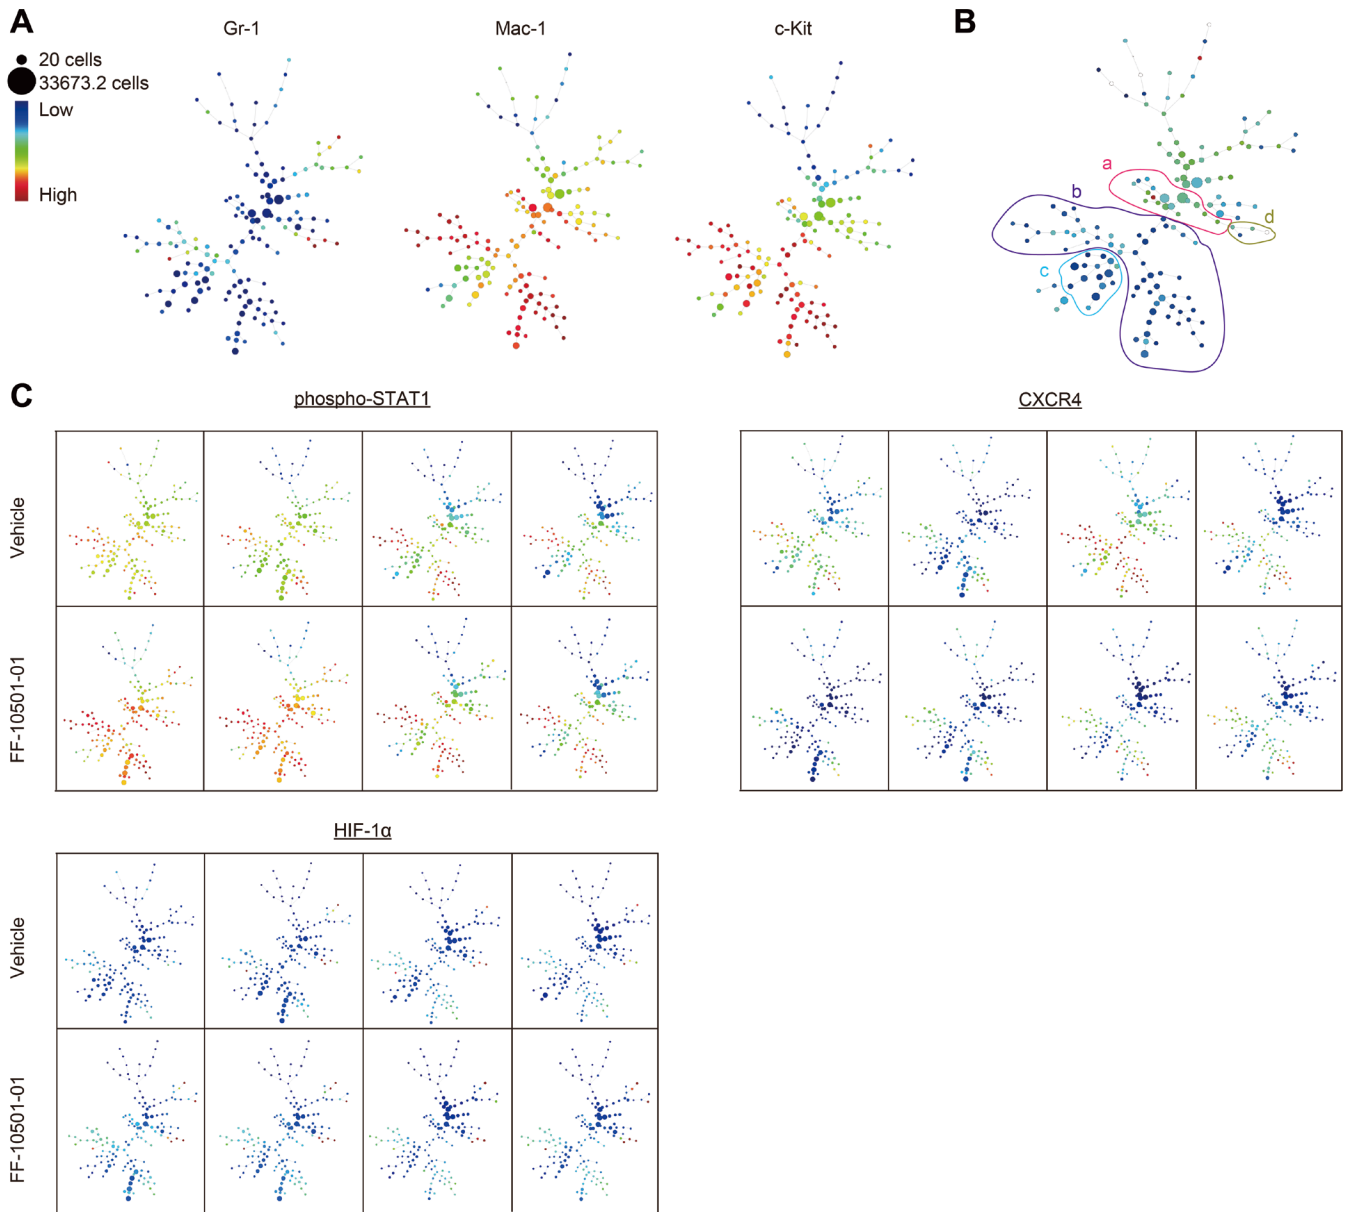

### Appendix Figure S9. Single-cell Mass Cytometry's gating strategy and results

CD45.2<sup>+</sup> MLL-AF9 cells were collected from CD45.1<sup>+</sup> recipient mice treated with vehicle (n=4) or FF-10501-01 (n=4) and were subjected to mass cytometry analysis. CD45.2<sup>+</sup> fraction was used for SPADE (Spanning-tree Progression Analysis of Density-normalized Events) analysis in Cytobank (<https://premium.cytobank.org/cytobank/login>). (A) Gr-1<sup>+</sup>, Mac-1<sup>+</sup>, and c-Kit<sup>+</sup> fractions were shown on the SPADE tree. (B) Gating strategy on SPADE tree using Gr-1, Mac-1 and c-Kit expression. Four populations were defined (related to Figure 6B). (C) Expression of phospho-STAT1, CXCR4, and HIF-1 $\alpha$  in each mouse was shown. The SPADE trees show each marker's median expression.

**A**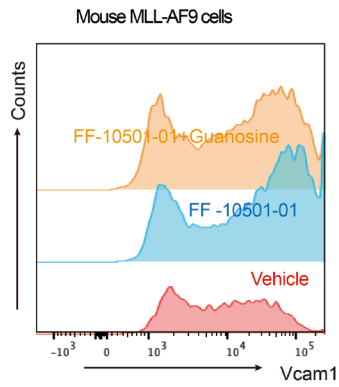**B**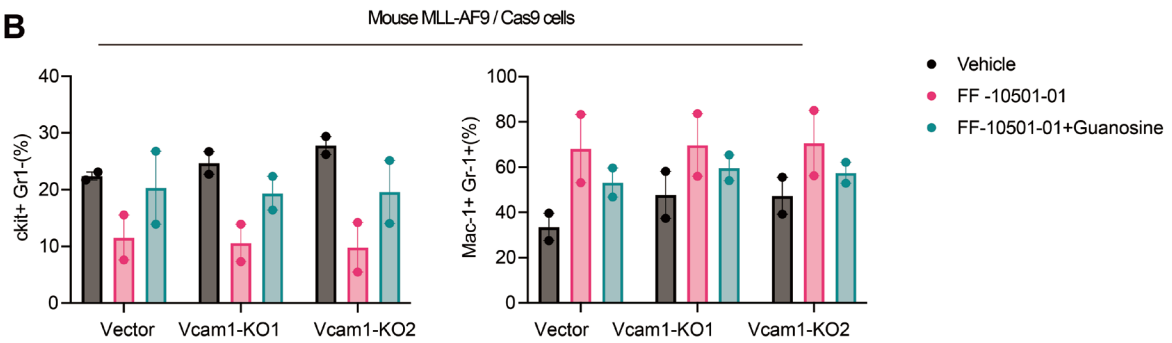

**Appendix Figure S10. Vcam1 is dispensable for FF-10501-01-induced myeloid differentiation of MLL-AF9 cells**

(A) Mouse MLL-AF9 cells were treated with/ without 5 mM FF-10501-01 and 10 mM guanosine in cytokine containing suspension medium for 48 hours. Vcam1 expression was evaluated by FCM. (B) Mouse MLL-AF9-Cas9 transduced with vector or two independent Vcam1-targeting sgRNAs (KO1 and KO2) were with/without 0.5 mM FF-10501-01 and 10 mM guanosine in cytokine containing suspension medium for 72 hours. Frequency of c-Kit<sup>+</sup> Gr-1<sup>-</sup> and Mac-1<sup>+</sup> Gr-1<sup>+</sup> in vehicle, FF-1050-01 or FF-10501-01+ guanosine treated cells with/without Vcam1-depletion. For each group, n=2.
